# Supplementary material for: Clinical Evaluation of the i-gel® Plus Supraglottic Airway in Japanese Patients: A Prospective Observational Study
Source: Research Square preprint supplement (doi:10.21203/rs.3.rs-6840336/v1), 2025-09-25
Supplement: Supplementary file 1 [file 90e005d78aa52f7502d5a829.docx]

**Supplementary Table 1** Detailed background and perioperative characteristics of the patients stratified by age and sex

| **Variables** | **Total**  **N = 64** | **Nonelderly***  **N = 32** | **Elderly†**  **N = 32** | **Male**  **N = 32** | **Female**  **N = 32** |
| --- | --- | --- | --- | --- | --- |
| Age | 69 (55, 77) | 55 (42, 64) | 78 (76, 81) | 69 (56, 76) | 70 (53, 78) |
| Male sex | 32 (50) | 16 (50) | 16 (50) | 32 (100) | 0 (0) |
| Height (cm) | 160.9 (152.0, 167.9) | 163.1 (158.3, 173.3) | 154.7 (150.0, 165.2) | 167.2 (162.4, 174.1) | 152.0 (149.2, 160.9) |
| Weight (kg) | 60.8 (50.9, 68.1) | 61.1 (51.9, 70.7) | 58.9 (50.9, 67.6) | 66.0 (60.0, 73.0) | 53.0 (45.7, 63.0) |
| BMI (kg/m2) | 23.2 (20.4, 26.3) | 22.6 (19.6, 25.5) | 23.3 (21.3, 26.5) | 23.3 (22.4, 26.5) | 22.2 (19.3, 25.0) |
| ASA classification  1  2  3  4 | 11 (17)  48 (75)  4 (6)  1 (2) | 11 (34)  21 (66)  0 (0)  0 (0) | 0 (0)  27 (84)  4 (13)  1 (3) | 4 (13)  25 (78)  2 (6)  1 (3) | 7 (22)  23 (72)  2 (6)  0 (0) |
| Mallampati class  1  2  3  Not recorded | 50 (78)  8 (13)  2 (3)  4 (6) | 24 (75)  4 (13)  1 (3)  3 (9) | 26 (81)  4 (13)  1 (3)  1 (3) | 27 (84)  3 (9)  2 (6)  0 (0) | 23 (72)  5 (16)  0 (0)  4 (13) |
| Restricted neck movement  Mild | 4 (6) | 2 (6) | 2 (6) | 3 (9) | 1 (3) |
| Asthma | 1 (2) | 1 (3) | 0 (0) | 1 (3) | 0 (0) |
| Hypertension | 31 (48) | 6 (19) | 25 (78) | 14 (44) | 17 (53) |
| Diabetes mellitus | 6 (9) | 1 (3) | 5 (16) | 3 (9) | 3 (9) |
| Dyslipidemia | 17 (27) | 4 (13) | 13 (41) | 8 (25) | 9 (28) |
| Ischemic heart disease | 1 (2) | 0 (0) | 1 (3) | 1 (3) | 0 (0) |
| COPD | 0 (0) | 0 (0) | 0 (0) | 0 (0) | 0 (0) |
| Smoking  Never  Past  Current | 36 (56)  19 (30)  9 (14) | 19 (59)  7 (22)  6 (19) | 17 (53)  12 (38)  3 (9) | 9 (28)  14 (44)  9 (28) | 27 (84)  5 (16)  0 (0) |
| Surgery type  Orthopedic  Urologic  Mammectomy  Gynecologic  General  Dermatologic | 20 (31)  20 (31)  14 (22)  5 (8)  4 (6)  1 (2) | 13 (41)  9 (28)  6 (19)  4 (13)  0 (0)  0 (0) | 7 (22)  11 (34)  8 (25)  1 (3)  4 (13)  1 (3) | 11 (34)  17 (53)  0 (0)  0 (0)  3 (9)  1 (3) | 9 (28)  3 (9)  14 (44)  5 (16)  1 (3)  0 (0) |
| Surgery time (min) | 69.0 (53.3, 97.3) | 68.0 (48.5, 101.8) | 71.5 (58.8, 92.3) | 77.5 (64.8, 108.5) | 60.5 (47.8, 86.8) |
| Anesthesia time (min) | 116.0 (96.5, 141.0) | 116.5 (93.5, 145.0) | 116.0 (100.8, 136.2) | 122.0 (104.5, 149.2) | 102.5 (92.8, 132.0) |
| Induction anesthetics  Propofol  Remimazolam | 60 (94)  4 (6) | 28 (88)  4 (13) | 32 (100)  0 (0) | 29 (91)  3 (9) | 31 (97)  1 (3) |
| Neuromuscular blocking drugs | 60 (94) | 28 (88) | 32 (100) | 32 (100) | 28 (88) |
| Total intravenous anesthesia | 45 (70) | 27 (84) | 18 (56) | 16 (50) | 29 (91) |
| Adjuvant analgesics  Flurbiprofen  Acetaminophen  Dexamethasone  Other steroids | 30 (47)  59 (92)  45 (70)  13 (20) | 17 (53)  31 (97)  23 (72)  6 (19) | 13 (41)  28 (88)  22 (69)  7 (22) | 10 (31)  30 (94)  20 (63)  6 (19) | 20 (63)  29 (91)  25 (78)  7 (22) |
| Size of i-gel® Plus  3  4 | 31 (48)  33 (52) | 16 (50)  16 (50) | 15 (47)  17 (53) | 0 (0)  16 (100) | 31 (97)  1 (3) |
| Anesthesiologists with ≥ 2-year experience | 51 (80) | 23 (72) | 29 (91) | 24 (75) | 28 (88) |

The data are shown as median (Q1, Q3) or number (%).

*Nonelderly patients were defined as age < 70 years.

†Elderly patients were defined as age ≥ 70 years.

ASA: American Society of Anesthesiologists, BMI: body mass index, COPD: chronic obstructive pulmonary disease

**Supplementary Table 2** Detailed background and perioperative characteristics of the patients, 16 patients in each group

| **Variables** | **Nonelderly* male**  **N = 16** | **Nonelderly* female**  **N = 16** | **Elderly† male**  **N = 16** | **Elderly† female**  **N = 16** |
| --- | --- | --- | --- | --- |
| Age | 56 (46, 64) | 51 (42, 65) | 77 (75, 82) | 79 (77, 81) |
| Male sex | 16 (100) | 0 (0) | 16 (100) | 0 (0) |
| Height (cm) | 173.6 (163.2, 176.3) | 159.3 (153.9, 163.1) | 165.5 (162.1, 167.5) | 150.0 (147.5, 152.0) |
| Weight (kg) | 70.8 (65.3, 80.0) | 50.9 (45.6, 56.4) | 61.0 (56.0, 68.3) | 53.4 (48.5, 67.1) |
| BMI (kg/m2) | 24.4 (22.7, 28.2) | 20.0 (18.7, 22.6) | 23.2 (20.7, 23.6) | 24.4 (22.1, 28.7) |
| ASA classification  1  2  3  4 | 4 (25)  12 (75)  0 (0)  0 (0) | 7 (44)  9 (56)  0 (0)  0 (0) | 0 (0)  13 (81)  2 (13)  1 (6) | 0 (0)  14 (88)  2 (13)  0 (0) |
| Mallampati class  1  2  3  Not recorded | 13 (81)  2 (13)  1 (6)  0 (0) | 11 (69)  2 (13)  0 (0)  3 (19) | 14 (88)  1 (6)  1 (6)  0 (0) | 12 (75)  3 (19)  0 (0)  1 (6) |
| Restricted neck movement  Mild | 1 (6) | 1 (6) | 2 (13) | 0 (0) |
| Asthma | 1 (6) | 0 (0) | 0 (0) | 0 (0) |
| Hypertension | 2 (13) | 4 (25) | 12 (75) | 13 (81) |
| Diabetes mellitus | 1 (6) | 0 (0) | 2 (13) | 3 (19) |
| Dyslipidemia | 2 (13) | 2 (13) | 6 (38) | 7 (44) |
| Ischemic heart disease | 0 (0) | 0 (0) | 1 (6) | 0 (0) |
| COPD | 0 (0) | 0 (0) | 0 (0) | 0 (0) |
| Smoking  Never  Past  Current | 6 (38)  4 (25)  6 (38) | 13 (81)  3 (19)  0 (0) | 3 (19)  10 (63)  3 (19) | 14 (88)  2 (13)  0 (0) |
| Surgery type  Orthopedic  Urologic  Mammectomy  Gynecologic  General  Dermatologic | 8 (50)  8 (50)  0 (0)  0 (0)  0 (0)  0 (0) | 5 (31)  1 (6)  6 (38)  4 (25)  0 (0)  0 (0) | 3 (19)  9 (56)  0 (0)  0 (0)  3 (19)  1 (6) | 4 (25)  2 (13)  8 (50)  1 (6)  1 (6)  0 (0) |
| Surgery time (min) | 87.0 (65.8, 98.3) | 55.0 (44.0, 86.0) | 74.0 (64.8, 95.8) | 66.5 (51.0, 87.8) |
| Anesthesia time (min) | 125.0 (98.5, 154.0) | 100.5 (85.3, 131.8) | 119.5 (105.8, 141.5) | 105.0 (97.5, 132.0) |
| Induction anesthetics  Propofol  Remimazolam | 16 (100)  0 (0) | 16 (100)  0 (0) | 13 (81)  3 (19) | 15 (94)  1 (6) |
| Neuromuscular blocking drugs | 16 (100) | 12 (75) | 16 (100) | 16 (100) |
| Total intravenous anesthesia | 11 (69) | 16 (100) | 5 (31) | 13 (81) |
| Adjuvant analgesics  Flurbiprofen  Acetaminophen  Dexamethasone  Other steroids | 7 (44)  15 (94)  10 (63)  3 (19) | 10 (63)  16 (100)  13 (81)  3 (19) | 3 (19)  15 (94)  10 (63)  3 (19) | 10 (63)  13 (81)  12 (75)  4 (25) |
| Size of i-gel® Plus  3  4 | 0 (0)  16 (100) | 16 (100)  0 (0) | 0 (0)  16 (100) | 15 (94)  1 (6) |
| Anesthesiologists with ≥ 2-year experience | 11 (69) | 12 (75) | 13 (81) | 16 (100) |

The data are shown as median (Q1, Q3) or number (%).

*Nonelderly patients were defined as age < 70 years.

†Elderly patients were defined as age ≥ 70 years.

ASA: American Society of Anesthesiologists, BMI: body mass index, COPD: chronic obstructive pulmonary disease

**Supplementary Table 3** Postoperative hoarseness and sore throat after the i-gel® Plus use

|  | **Postanesthesia care unit**  **N = 64** | **Postoperative day 1**  **N = 64** |
| --- | --- | --- |
| **Hoarseness** |  |  |
| None | 52 (81) | 59 (92) |
| Mild | 7 (11) | 4 (6) |
| Moderate | 4 (6) | 1 (2) |
| Severe | 0 (0) | 0 (0) |
| Not recorded | 1 (2)* | 0 (0) |
| **Sore throat** |  |  |
| None | 57 (89) | 57 (89) |
| Mild | 6 (9) | 7 (11) |
| Moderate | 0 (0) | 0 (0) |
| Severe | 0 (0) | 0 (0) |
| Not recorded | 1 (2)* | 0 (0) |

The data are shown as number (%).

*One patient could not express severity of their throat symptoms at the postanesthesia care unit.

**Supplementary Figure** Distribution of oropharyngeal leak pressure of i-gel® Plus across different patient groups

Each colored circle represents the observed value for one patient. The lower and upper edges of the boxes indicate the 25th and 75th percentiles, respectively. The bold horizontal line within each box represents the median. The whiskers extend to the lowest and highest values within 1.5 times the interquartile range. Outliers are shown as circles.
